# Supplementary material for: Influence of Egr-1 in Cardiac Tissue-Derived Mesenchymal Stem Cells in Response to Glucose Variations
Source: Hindawi journal article supplement (doi:10.1155/2014/254793), 2014-01-01

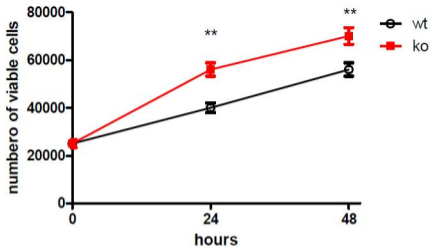

Supplementary figure 2

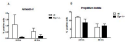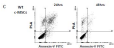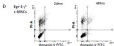

Supplement: f1 [file 254793.f1.pdf]
